# Supplementary material for: The development and use of a spatial database for the determination and characterization of the state of the German Baltic small-scale fishery sector
Source: Oxford University Press journal article supplement (doi:10.1093/icesjms/fss096), 2012-06-13
Supplement: fss096suppl.doc [file fss096suppl.doc]

SUPPLEMENTARY MATERIAL: ICES JOURNAL OF MARINE SCIENCE, ##

The development and use of a spatial database for the determination and characterisation of the state of the German Baltic Small-Scale Fishery sector

Eva Papaioannou, Athanasios Vafeidis, Martin F. Quaas, Jörn O. Schmidt

Table S1. Fishing harbours dataset (Extract)

| **Port**  **Name** | **Port Code** | **X**  **Point** | **Y**  **Point** | **ICES**  **Area** | **Geo**  **Area** | **ICES Name** | **Country**  **Code** | **New**  **code** | **Notes** |
| --- | --- | --- | --- | --- | --- | --- | --- | --- | --- |
| ALTWARP | 631 | 14.27 | 53.73 | 24 | MV | 36G4 | GM | GM631 | … |
| GOTHMUND | 218 | 10.75 | 53.90 | 22 | SH | 36G0 | GM | GM218 | Partly inland <12 nm |
| KAMMINKE | 630 | 14.20 | 53.86 | 24 | MV | 36G4 | GM | GM630 | … |
| MOENKEBUDE | 632 | 13.96 | 53.77 | 24 | MV | 36G3 | GM | GM632 | … |
| TIMMENDORF | 215 | 11.37 | 53.99 | 22 | MV | 36G1 | GM | GM215 | … |
| USEDOM | 633 | 13.92 | 53.87 | 24 | MV | 36G3 | GM | GM633 | … |

Note: Extract of fishing harbours’ dataset developed within the context of the analysis after combining available primary sources. The harbour dataset was edited (e.g. fields re-naming, new code field, new fields ‘ICES Area’ and ‘Name’ etc) to allow the integration of additional data, such as the CFR and logbook information, through a series of queries. The fishing harbour data were then integrated within a GIS database.

Field ‘Port code’ according to the CFR codification system; X, Y points are X, Y coordinates of location of port as point position; Fields ‘ICES Area’ and ‘ICES Name’, include information on the respective Subdivision (Area) and statistical rectangle where the port is located; Field ‘GEO Area’ denotes the German Federal State where the port is located (MV- Mecklenburg-Western Pomerania, SH- Schleswig-Holstein); Field ‘Country Code’, Country where the port belongs (GM- Germany); Field ‘New Code’ combines the Country and CFR Code information; Field ‘Notes’ includes information on special features of ports (e.g. inland port etc).

Table S2. Fleet Register dataset example (Extract)

| **Country Code** | **Vessel**  **Name** | **Port**  **Code** | **Port**  **Name** | **Gear Main Code** | **Gear Sec Code** | **Loa** | **Ton Gt** | **Power**  **Main** | **…** |
| --- | --- | --- | --- | --- | --- | --- | --- | --- | --- |
| DEU | … | 313 | ACCUMERSIEL | TBB | OTB | 14.97 | 23 | 221 |  |
| DEU | … | 313 | ACCUMERSIEL | TBB | OTB | 17.55 | 31 | 175 |  |
| … |  |  |  |  |  |  |  |  |  |
| DEU | … | 618 | AHLBECK | GNS | LLS | 6 | 1 | 4 |  |
| … |  |  |  |  |  |  |  |  |  |
| DEU | … | 618 | AHLBECK | GNS | LLS | 6.7 | 2 | 44 |  |
| … |  |  |  |  |  |  |  |  |  |
| DEU | … | 631 | ALTWARP | GNS | NK | 8.65 | 3 | 9 |  |

Note: CFR extract for Germany (last accessed: 2/2010); information includes port code/name, main/secondary gear code (e.g. GNS: Gillnets, see Table S4 for full list), length overall (Loa), gross tonnage (GT) and engine power (kW).

N.B.: Single ports have numerous vessels (one-to-many relationship). Field entries ‘Vessel name’ have been erased for privacy policy considerations. …: indicate that additional fields/entries are present but were omitted.

Table S3. Logbook dataset example (Extract)

| **Year** | **Month** | **Landing**  **harbour** | **Landing**  **date** | **Fish**  **Sp.** | **Length**  **class** | **Gear** | **ICES Rec.** | **Landings (kg)** | **Price**  **(€)** |
| --- | --- | --- | --- | --- | --- | --- | --- | --- | --- |
| 2008 | 1 | BURGSTAAKEN | 1/7/08 16:00 | COD | > 10 m | OTB | 37G1 | 450 | 1 009 |
| 2008 | 1 | BURGSTAAKEN | 1/7/08 16:00 | DAB | > 10 m | OTB | 37G1 | 132 | 123 |
| … |  |  |  |  |  |  |  |  |  |
| 2008 | 1 | GROSSENBRODE | 1/1/08 18:00 | BLL | > 10 m | GNS | 37G1 | 1 | 3 |
| 2008 | 1 | GROSSENBRODE | 1/1/08 18:00 | COD | > 10 m | GNS | 37G1 | 897 | 2 975 |
| … |  |  |  |  |  |  |  |  |  |
| 2008 | 1 | KAPPELN | 1/14/08 10:00 | COD | > 10 m | PTB | 38G0 | 146 | 288 |

Note: Logbook dataset extract for Germany (Year 2008) (Source: BLE); information includes year, month, date and time when landing incidents occurred, landed species code (e.g. HER: Herring), length class of the vessel (either generic ‘<10 m’, or explicit length, e.g. 5.5 m), ICES rectangle landings originated from (e.g. 37G3), weight (Kg) of landings and price (€) of landings. N.B.: Single ports have numerous vessels (one-to-many relationship) and many simultaneous landing operations occur at the same time/date. …: indicate that additional fields/entries are present but were omitted for better visualization.

Table S4. Fishing strategies and technical specifications of segments of German Baltic SSF sector

| **Gear Primary** | **Gear Secondary** | | **Thresholds in technical characteristics** |
| --- | --- | --- | --- |
| GNS | | LLS | <12 LoA, <20 GT  N.B. 13 vessels with kW>100 |
| GNS | | FPO | <12 LoA, <10 GT |
| GNS | | NK | <12 LoA |
| GNS | | NO | <12 LoA, <20 GT |
| GNS | | GNS | <12 LoA, <10 GT, <100 kW |
| FPO | | GNS | <12 LoA, <10 GT, <100 Kw |
| FPO | | NO | <12 LoA, <10 GT, <50 kW |
| FPO | | LLS |  |
| LLS | | GNS |  |
| LLS | | FPO | <12 LoA, <10 GT, <10 kW |
| Codes for Fishing gear  (After: ISSCFG FAO, 1980; EU CFR Gear Codification):  FPO: Pots and Traps;  GNS: Set gillnets (anchored);  LLS: Set long-lines;  NO: No gear;  NK: Gear Not Known | | | |

Table S5. Fishing strategies (Logbook data) of German Baltic SSF sector

| **<10 m LoA** | **>10 m LoA** | |
| --- | --- | --- |
| **SSF**  **Gear Strategies** | **SSF**  **Gear Strategies** | **Non-SSF**  **Gear Strategies** |
| Generic gear type:  ‘Static nets’ | FPN: Pound nets | DRB: Boat dredges |
| FPO: Pots and traps | OTB: Otter Trawls |
| FWR: Barriers, fences and weirs | OTM: Otter Trawls |
| GND: Drift nets | PTB: Pair Trawls |
| GNS: Gillnets | PTM: Pair Trawls |
| LHP: Hand-lines and pole-lines (hand operated) | SDN: Danish seines |
| LL: Long-lines (not specified) | SSC: Scottish seines |
| LLS: Drifting long-lines | TBB: Beam Trawls |

Table S6. Composition of German Baltic fishing fleet

|  | **Total No.** | **% contribution** | **Small-scale**  **vessels** | **Medium/**  **large vessels** |
| --- | --- | --- | --- | --- |
| **Static** | 1 396 | 76 | 1 335 | 61 |
| **Active** | 342 | 19 | 0 | 342 |
| **Mixed** | 87 | 5 | 14 | 73 |
| **TOTAL** | **1 825** | **100** | **1 349** | **476** |

N.B. Results of total German Baltic SSF similar to respective numbers by EUROPARL 2011

Table S7. Fishing strategies/Segments of SSF sector

| **Gear strategy** | **No. of vessels** | **Technical Specifications** | | |
| --- | --- | --- | --- | --- |
| **Avg LoA** | **Avg GT** | **Avg kW** |
| GNS_LLS | 679 | 6.4 | 2.5 | 22.5 |
| GNS_FPO | 461 | 5.9 | 1.6 | 15.6 |
| GNS_NK | 85 | 6.8 | 2.2 | 15.3 |
| GNS_NO | 67 | 6.1 | 2.0 | 12.7 |
| GNS_GNS | 18 | 7.0 | 3.4 | 21.6 |
| FPO_GNS | 11 | 5.8 | 1.0 | 18.0 |
| FPO_NO | 9 | 4.7 | 1.0 | 2.8 |
| LLS_FPO | 3 | 5.9 | 1.3 | 12.3 |
| LLS_GNS† | 1 | 9.0 | 12 | 135 |
| FPO_LLS† | 1 | 5.2 | 1.0 | 19 |
| GNS_OTB | 9 | 10 | 10 | 86.7 |
| GNS_PTB | 3 | 10.0 | 10.0 | 109 |
| OTB_GNS | 2 | 10.3 | 8.5 | 79 |

**†** Corresponds to single vessel

Fig. S1. Total weight of landings (t) of SSF <10 m LoA of major species (2008)


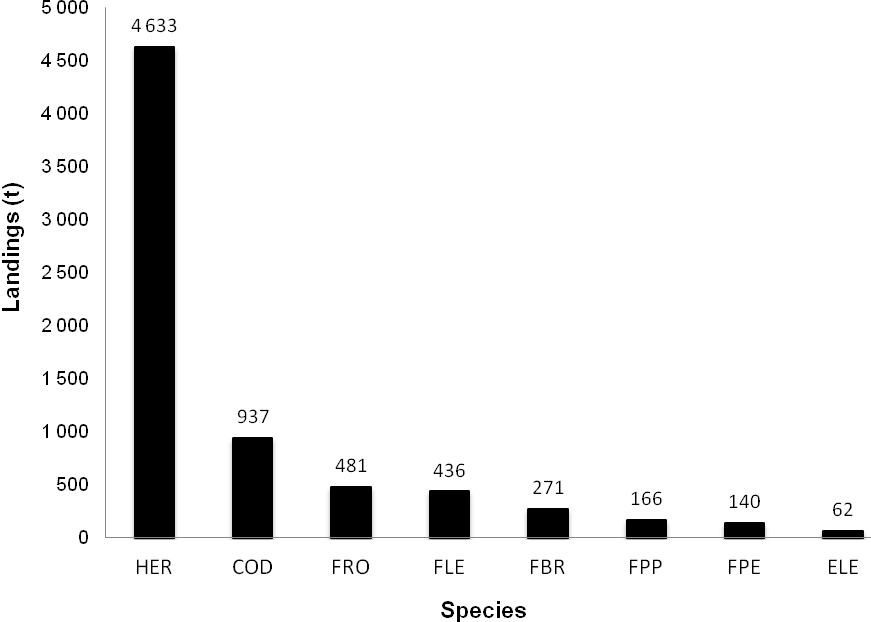


Where: HER- Herring, COD – Cod, FRO-Roach, FLE-European flounder, FBR-Common bream, FPP-Pike-perch, FPE-European perch, ELE – European eel. N.B. Logbook’s aggregated group ‘Others’, does not include information on comprising species and landings of the group correspond to less than 0.5% of total; group was omitted from the analysis.

**References**

European Community Fleet Register. 2010. <http://ec.europa.eu/fisheries/fleet/index.cfm> (last accessed February 2010).

EUROPARL. 2011. Characteristics of Small-Scale Coastal Fisheries in Europe. Study of the DG of the Internal Policies of the Union, Brussels, European Parliament, 156 pp. (available at: <http://www.europarl.europa.eu/studies>).

FAO. 1980. International Standard Statistical Classification of Fishing Gear (ISSCFG), FAO Fisheries Report, R242, Coordinating Working Party (CWP)—Report of the 10th Session, Madrid, 22–29 July 1980, 65 pp.
